# Supplementary material for: Halogen functionalization-induced modulation of ferromagnetism and electronic phases in CrXY monolayers
Source: Royal Society of Chemistry journal article supplement (doi:10.1039/d5tc02548f), 2025-10-28
Supplement: d5tc02548f1.pdf [file d5tc02548f1.pdf]

# Supplementary Information

## Halogen Functionalization-Induced Modulation of Ferromagnetism and Electronic Phases in CrXY Monolayers

Xiaolong He <sup>a</sup>, Dongni Wu <sup>a</sup>, Yangfang Liao <sup>a</sup>, and Jing Xie <sup>a,\*</sup>

<sup>a</sup> College of Physics and Electronic Science, Guizhou Normal University, Guiyang 550001, China

### 1. The AIMD simulation results and phonon dispersion of the CrSSeF<sub>2</sub> monolayer

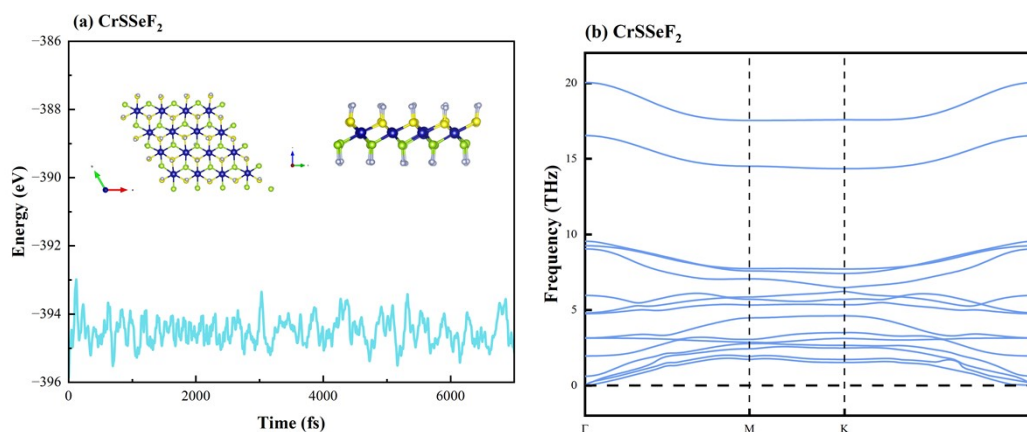

**Fig. S1** (a) The variation of temperature as a function of step at temperatures of 300 K for the CrSSeF<sub>2</sub> monolayer. (b) The phonon dispersion of CrSSeF<sub>2</sub> monolayer.

### 2. The schematic plot of PDOS of the CrSSe monolayer

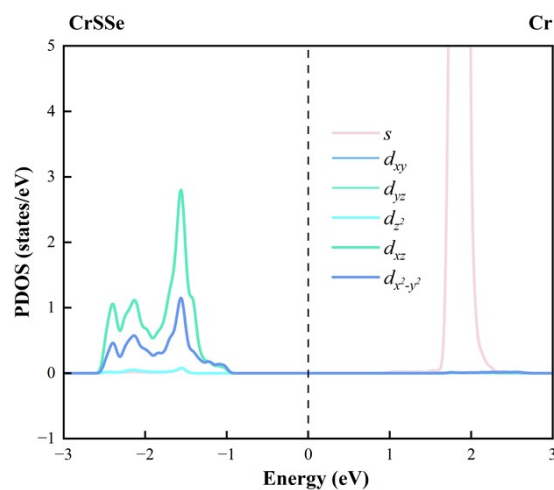

**Fig. S2** The PDOS of the CrSSe monolayer.

### 3. Orbital-resolved magnetic anisotropy energies of the CrSTeBr<sub>2</sub> monolayer

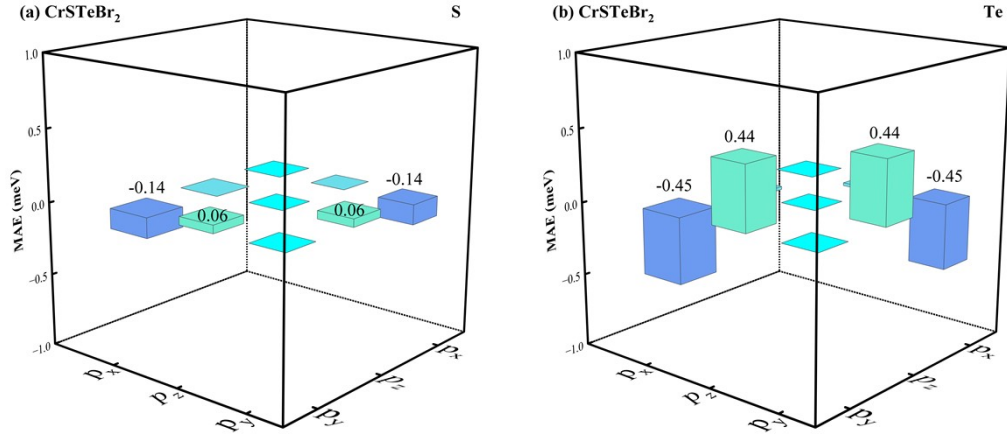

**Fig. S3** Orbital-resolved MAE of the CrSTeBr<sub>2</sub> monolayer.

### 4. The difference of spin-orbital angular momentum matrix elements

**Table S1** The matrix differences for  $p$  orbitals between magnetization along  $x$  [100] and  $z$  [001] directions.  $u^-$ ,  $o^+$ ,  $o^-$  represent unoccupied spin-down states, occupied spin-up and spin-down states, respectively.

| $u^-$ | $o^+$ |       |       | $o^-$ |       |       |
|-------|-------|-------|-------|-------|-------|-------|
|       | $p_y$ | $p_z$ | $p_x$ | $p_y$ | $p_z$ | $p_x$ |
| $p_y$ | 0     | -1    | 1     | 0     | 1     | -1    |
| $p_z$ | -1    | 0     | 0     | 1     | 0     | 0     |
| $p_x$ | 1     | 0     | 0     | -1    | 0     | 0     |

**Table S2** The matrix differences for  $d$  orbitals between magnetization along  $x$  [100] and  $z$  [001] directions.

| $u^-$         | $o^+$    |          |           |          |               | $o^-$    |          |           |          |               |
|---------------|----------|----------|-----------|----------|---------------|----------|----------|-----------|----------|---------------|
|               | $d_{xy}$ | $d_{yz}$ | $d_{z^2}$ | $d_{xz}$ | $d_{x^2-y^2}$ | $d_{xy}$ | $d_{yz}$ | $d_{z^2}$ | $d_{xz}$ | $d_{x^2-y^2}$ |
| $d_{xy}$      | 0        | 0        | 0         | 1        | -4            | 0        | 0        | 0         | -1       | 4             |
| $d_{yz}$      | 0        | 0        | 3         | -1       | 1             | 0        | 0        | -3        | 1        | -1            |
| $d_{z^2}$     | 0        | 3        | 0         | 0        | 0             | 0        | -3       | 0         | 0        | 0             |
| $d_{xz}$      | 1        | -1       | 0         | 0        | 0             | -1       | 1        | 0         | 0        | 0             |
| $d_{x^2-y^2}$ | -4       | 1        | 0         | 0        | 0             | 4        | -1       | 0         | 0        | 0             |



## 5. The Curie temperature $T_C$ of the CrXY and CrXYT<sub>2</sub> monolayers

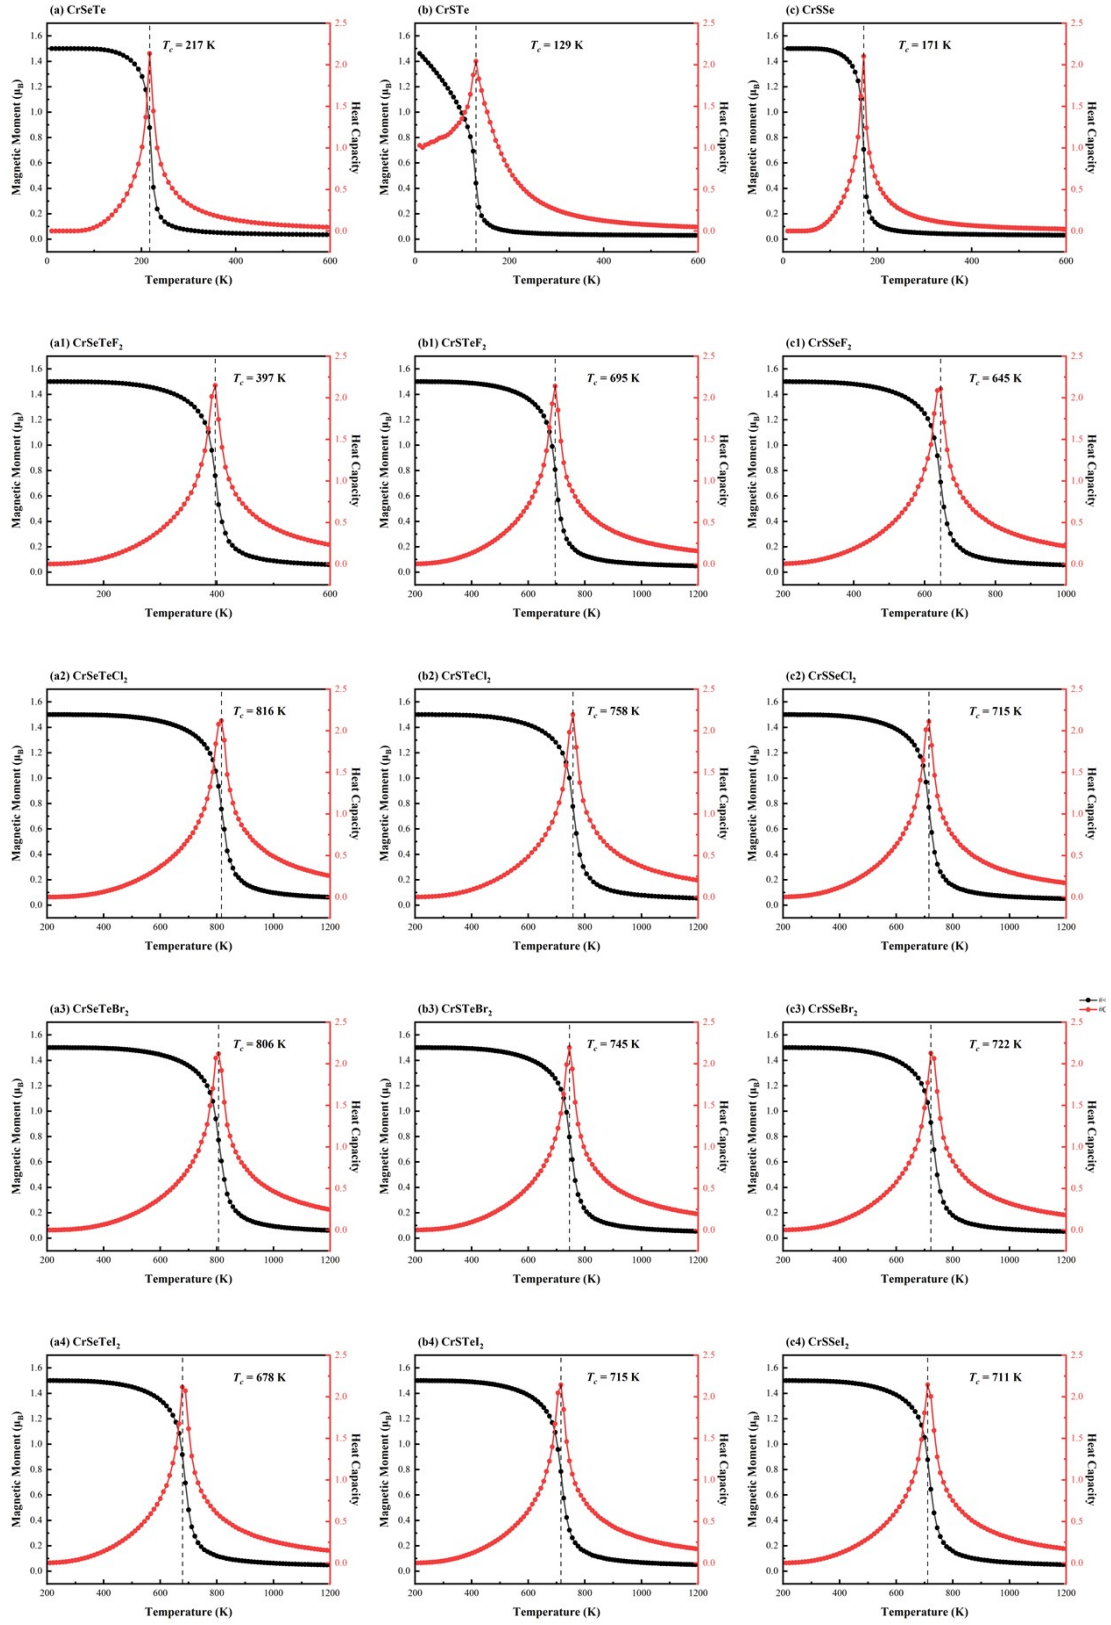

**Fig. S4** Temperature dependence of the magnetic moment  $M$  and specific heat capacity  $C_v$ . The  $T_C$  for CrXY and CrXYT<sub>2</sub> monolayers are identified by the peak position in  $C_v$  and the transition point of  $M$ .
